# Supplementary figures and images for: Unequal burden of COVID-19 in Hungary: a geographical and socioeconomic analysis of the second wave of the pandemic
Source: PubMed Central journal article supplement — BMJ Glob Health. 2021 Sep 9;6(9):e006427. doi: 10.1136/bmjgh-2021-006427 (PMC8438581; doi:10.1136/bmjgh-2021-006427), 2021-09-09

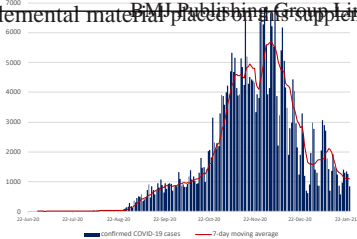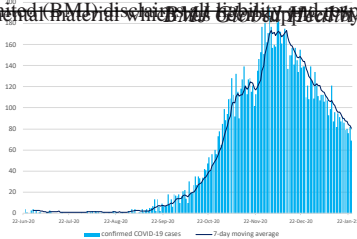

Supplement: bmjgh-2021-006427supp001.pdf [file bmjgh-2021-006427supp001.pdf]
